# Supplementary material for: Immune Regulatory 1 Cells: A Novel and Potent Subset of Human T Regulatory Cells
Source: PubMed Central journal article supplement (PMC8867398; doi:10.3389/fimmu.2021.790775), 2022-02-08

## Supplementary Figures

### Figure 1.1

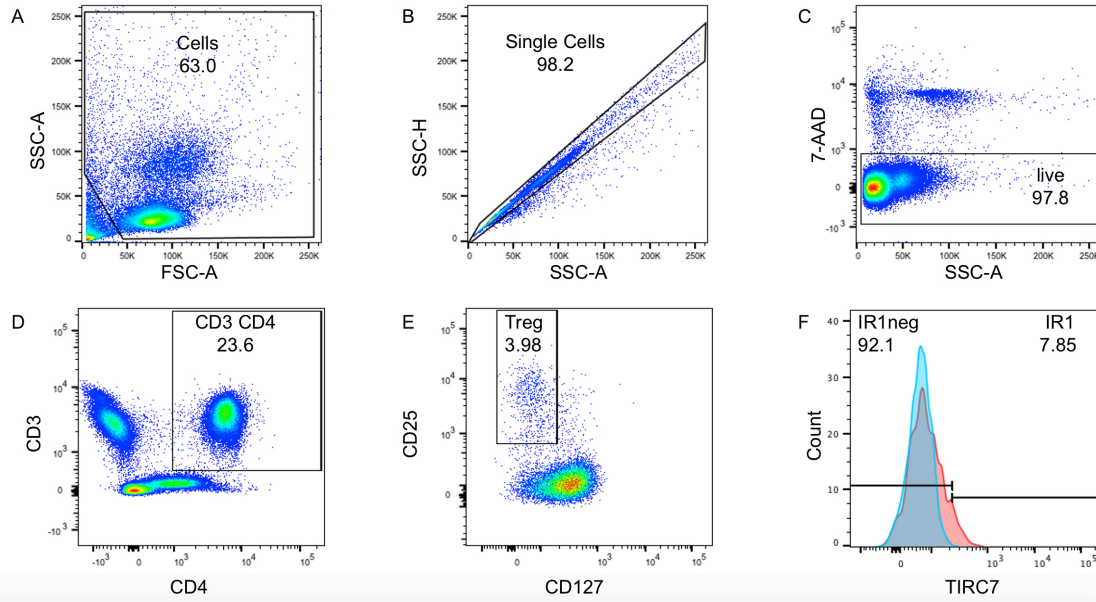

### Supplementary Figure 1.2.

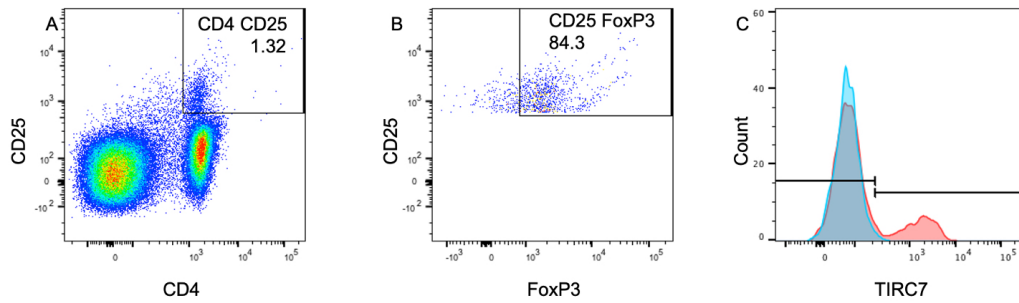

### Supplementary Figure 1.3.

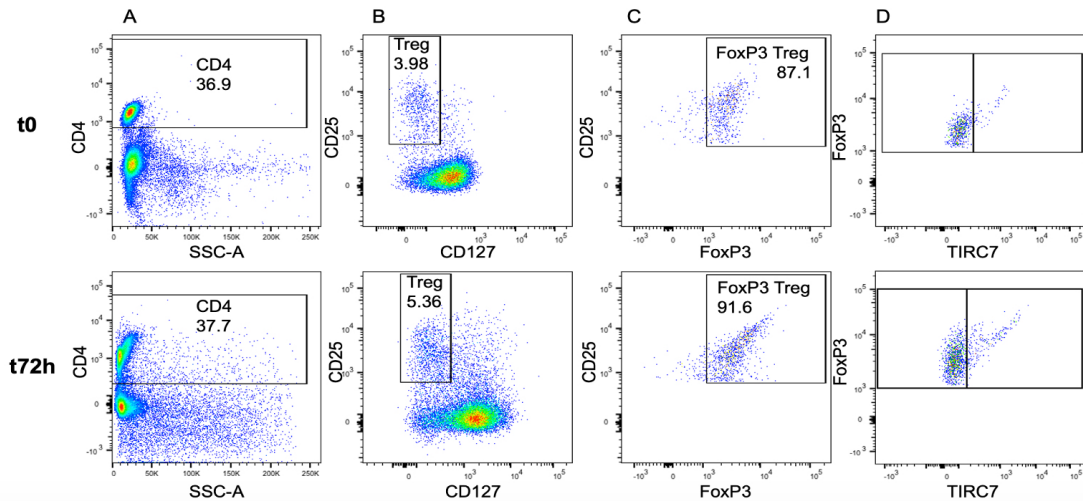

Supplementary Figure 1.4.

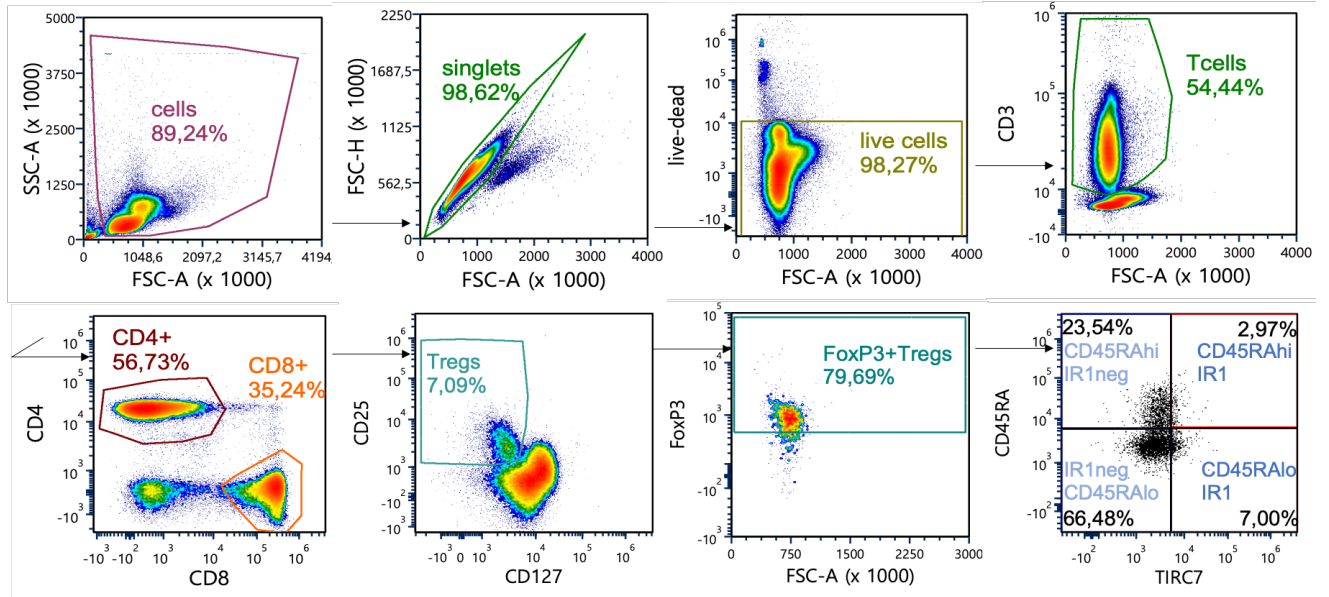

Supplementary Figure 2A

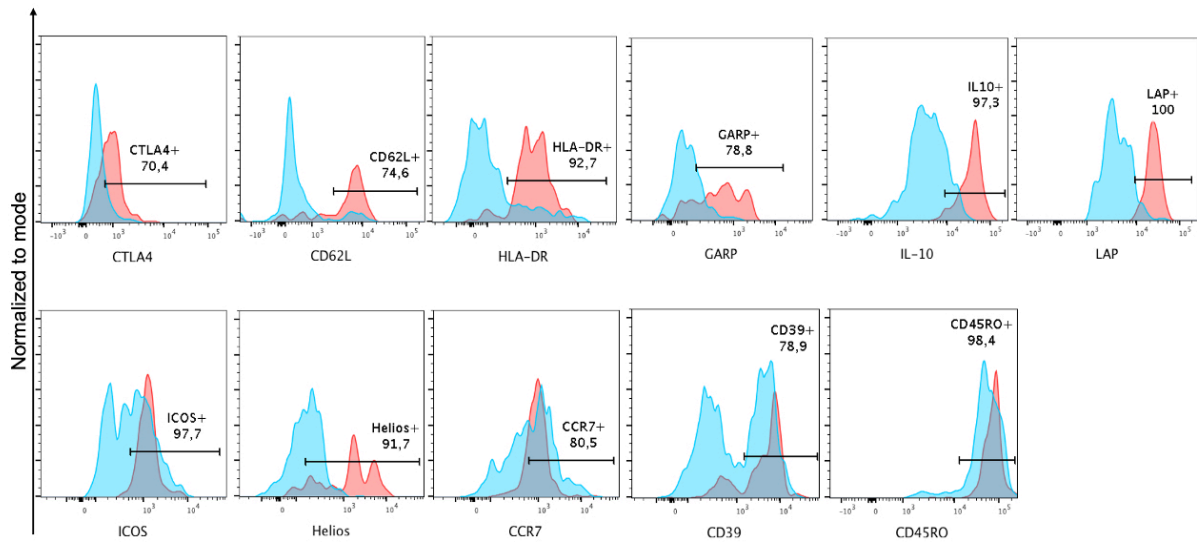

Supplementary Figure 2B

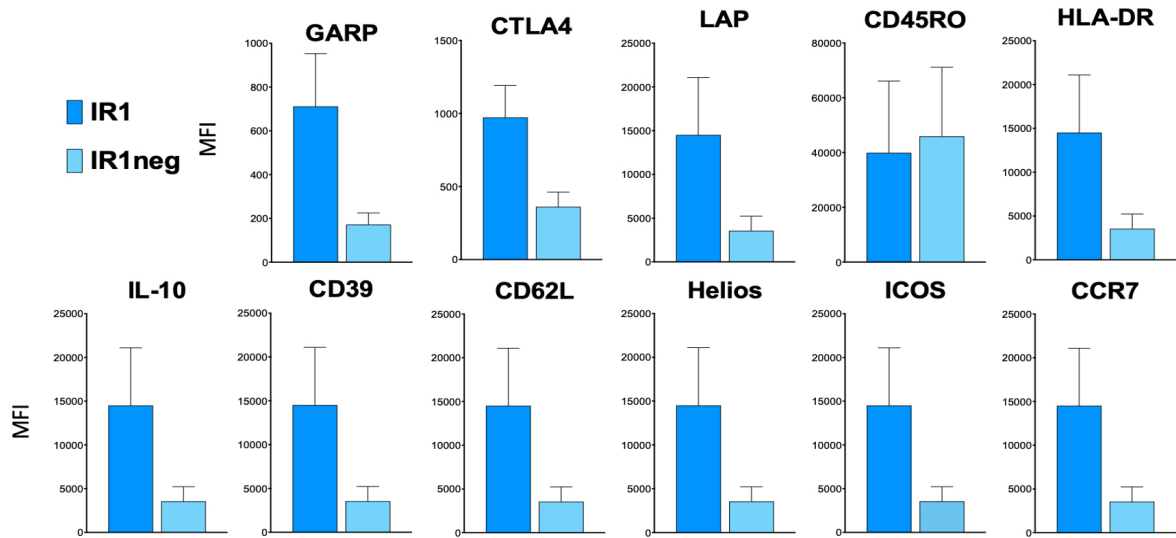

Supplementary Figure 3

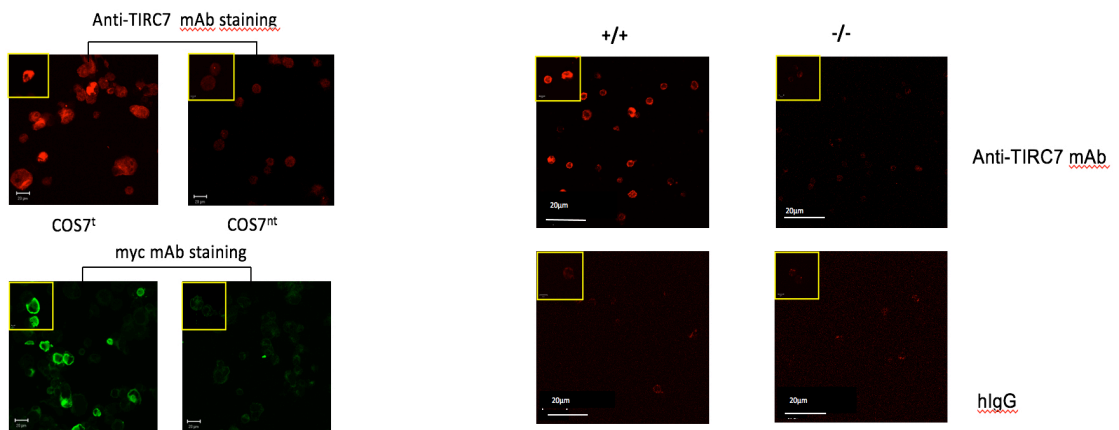

Supplement: Image_1.pdf [file Image_1.pdf]
